# Supplementary material
Source: publisher figshare collection journal article supplement (https://diabetesjournals.figshare.com/articles/dataset/_/16608850)
Supplement: Supplementary file 1 [file 3]

## Gene panel sequencing of patients with monogenic diabetes brings to light genes typically associated with syndromic presentations

Submitted by Cécile Saint-Martin *et al*

**Supplementary Table 1:** Clinical characteristics of the whole cohort.

|                                          |                           |
|------------------------------------------|---------------------------|
| Characteristic                           |                           |
| N                                        | 1676                      |
| Sex, female/male                         | 54% / 46%                 |
| Eurocaucasian                            | 47% (1583)                |
| ≥3 affected generations                  | 52% (1421)                |
| Age at diagnosis, years                  | 25 [15-34] (1635)         |
| BMI at diagnosis, kg/m <sup>2</sup>      | 23.5 [20.5-27.2] (1364)   |
| BMI at diagnosis <25 kg/m <sup>2</sup>   | 848/514 (62%) (1362)      |
| BMI at referral, kg/m <sup>2</sup>       | 24.2 [21.3-27.98] (1476)  |
| Symptoms* at diagnosis                   | 50% (1539)                |
| HbA <sub>1c</sub> at diagnosis, %        | 9.3 [6.8-12] (965)        |
| HbA <sub>1c</sub> at diagnosis, mmol/mol | 78.15 [50.82-107.7] (965) |
| HbA <sub>1c</sub> at referral, %         | 7.2 [6.3-8.9] (1355)      |
| HbA <sub>1c</sub> at referral, mmol/mol  | 55.2 [45.36-73.78] (1355) |
| Duration since diagnosis, years          | 5 [1-15] (1636)           |
| Therapy at diagnosis insulin/OHA/diet    | 593/546/355               |
| Insulin therapy (at diagnosis): yes/no   | 40% (1494)                |
| Therapy at referral insulin/OHA/diet     | 892/438/238               |
| Insulin therapy (at referral): yes/no    | 57% (1568)                |
| Arterial hypertension, yes/no            | 19% (1342)                |
| Dyslipidemia, yes/no                     | 27% (972)                 |

\*Symptoms defined by polyuria, weight loss, ketosis or ketoacidosis

Data are presented as median [25<sup>th</sup> percentile - 75<sup>th</sup> percentile] unless otherwise indicated. (n) total number of patients with available data.

**Supplementary Table 2: Panel gene list.**

| Gene           | OMIM ID | Reference transcript | Syndromic yes/no |
|----------------|---------|----------------------|------------------|
| <i>ABCC8</i>   | 600509  | NM_001287174.1       | no               |
| <i>CISD2</i>   | 611507  | NM_001008388.4       | yes              |
| <i>GATA4</i>   | 600576  | NM_001308093.1       | yes              |
| <i>GATA6</i>   | 601656  | NM_005257.5          | yes              |
| <i>GCK</i>     | 138079  | NM_000162.3          | no               |
| <i>HNF1A</i>   | 142410  | NM_000545.6          | no               |
| <i>HNF1B</i>   | 189907  | NM_000458.3          | yes              |
| <i>HNF4A</i>   | 600281  | NM_175914.4          | no               |
| <i>INS</i>     | 176730  | NM_000207.2          | no               |
| <i>INSR</i>    | 147670  | NM_000208.2          | yes              |
| <i>KCNJ11</i>  | 600937  | NM_000525.3          | no               |
| <i>NEUROD1</i> | 601724  | NM_002500.4          | no               |
| <i>PDX1</i>    | 600733  | NM_000209.4          | no               |
| <i>PLIN1</i>   | 170290  | NM_002666.5          | yes              |
| <i>RFX6</i>    | 612659  | NM_173560.3          | no               |
| <i>TRMT10A</i> | 616013  | NM_152292.4          | yes              |
| <i>WFS1</i>    | 606201  | NM_006005.3          | yes              |

**Supplementary Table 3:** List of variants identified in this study

| <b>GCK NM_000162.3 (104 unique heterozygous variants in 124 probands)</b> |                       |                       |                           |
|---------------------------------------------------------------------------|-----------------------|-----------------------|---------------------------|
| <b>DNA change</b>                                                         | <b>Protein change</b> | <b>Classification</b> | <b>Number of probands</b> |
| c.(?_1)_(45+1_46-1)del                                                    | p.?                   | CL5                   | 1                         |
| c.(45+1_46-1)_(1398_?)del                                                 | p.?                   | CL5                   | 1                         |
| c.(679+1_680-1)_(863+1_864-1)del                                          | p.?                   | CL4                   | 1                         |
| c.56T>A                                                                   | p.Ile19Asn            | CL4                   | 1                         |
| c.106C>T                                                                  | p.Arg36Trp            | CL5                   | 2                         |
| c.109A>G                                                                  | p.Met37Val            | CL4                   | 1                         |
| c.110T>C                                                                  | p.Met37Thr            | CL4                   | 1                         |
| c.113A>C                                                                  | p.Gln38Pro            | CL4                   | 1                         |
| c.127C>T                                                                  | p.Arg43Cys            | CL5                   | 1                         |
| c.128G>C                                                                  | p.Arg43Pro            | CL4                   | 1                         |
| c.128G>A                                                                  | p.Arg43His            | CL5                   | 1                         |
| c.130G>A                                                                  | p.Gly44Ser            | CL5                   | 1                         |
| c.161G>A                                                                  | p.Ser54Asn            | CL4                   | 1                         |
| c.184G>A                                                                  | p.Val62Met            | CL5                   | 2                         |
| c.208+15C>G                                                               | p.?                   | CL3                   | 1                         |
| c.214G>A                                                                  | p.Gly72Arg            | CL5                   | 1                         |
| c.245C>T                                                                  | p.Thr82Ile            | CL4                   | 1                         |
| c.266_275del                                                              | p.Val89fs             | CL5                   | 1                         |
| c.292C>T                                                                  | p.Gln98*              | CL5                   | 2                         |
| c.329T>C                                                                  | p.Ile110Thr           | CL3                   | 1                         |
| c.343A>G                                                                  | p.Met115Val           | CL4                   | 1                         |
| c.364-1G>A                                                                | p.?                   | CL5                   | 1                         |
| c.370G>C                                                                  | p.Asp124His           | CL4                   | 1                         |
| c.386G>A                                                                  | p.Cys129Tyr           | CL5                   | 1                         |
| c.446C>T                                                                  | p.Thr149Ile           | CL4                   | 1                         |
| c.449T>C                                                                  | p.Phe150Ser           | CL5                   | 1                         |
| c.452_454del                                                              | p.Ser151del           | CL4                   | 1                         |

|              |                    |     |   |
|--------------|--------------------|-----|---|
| c.469G>A     | p.Glu157Lys        | CL1 | 2 |
| c.478G>A     | p.Asp160Asn        | CL5 | 1 |
| c.491T>A     | p.Leu164His        | CL4 | 1 |
| c.508G>A     | p.Gly170Ser        | CL4 | 1 |
| c.512T>G     | p.Phe171Cys        | CL4 | 1 |
| c.526G>A     | p.Ala176Thr        | CL4 | 1 |
| c.533G>A     | p.Gly178Glu        | CL4 | 1 |
| c.544G>A     | p.Val182Met        | CL5 | 1 |
| c.556C>T     | p.Arg186*          | CL5 | 1 |
| c.559G>T     | p.Asp187Tyr        | CL4 | 1 |
| c.562G>A     | p.Ala188Thr        | CL5 | 1 |
| c.571C>T     | p.Arg191Trp        | CL5 | 6 |
| c.572G>A     | p.Arg191Gln        | CL5 | 2 |
| c.604A>G     | p.Met202Val        | CL3 | 1 |
| c.607del     | p.Val203*          | CL4 | 1 |
| c.607_627dup | p.Val203_Thr209dup | CL4 | 1 |
| c.623C>T     | p.Ala208Val        | CL5 | 1 |
| c.626C>A     | p.Thr209Lys        | CL4 | 1 |
| c.629T>C     | p.Met210Thr        | CL5 | 2 |
| c.635C>G     | p.Ser212Cys        | CL4 | 1 |
| c.661G>A     | p.Glu221Lys        | CL5 | 2 |
| c.667G>A     | p.Gly223Ser        | CL5 | 1 |
| c.676G>A     | p.Val226Met        | CL4 | 2 |
| c.679G>A     | p.Gly227Ser        | CL5 | 2 |
| c.679+1G>T   | p.?                | CL5 | 1 |
| c.679+5G>A   | p.?                | CL3 | 1 |
| c.683C>A     | p.Thr228Lys        | CL4 | 1 |
| c.683C>T     | p.Thr228Met        | CL5 | 1 |
| c.700T>C     | p.Tyr234His        | CL4 | 1 |
| c.713del     | p.Met238fs         | CL5 | 1 |
| c.725A>G     | p.Glu242Gly        | CL4 | 1 |

|                   |                    |     |   |
|-------------------|--------------------|-----|---|
| c.748C>T          | p.Arg250Cys        | CL4 | 1 |
| c.752T>C          | p.Met251Thr        | CL4 | 1 |
| c.764C>G          | p.Thr255Ser        | CL4 | 1 |
| c.764C>A          | p.Thr255Asn        | CL4 | 1 |
| c.769T>C          | p.Trp257Arg        | CL5 | 2 |
| c.773G>A          | p.Gly258Asp        | CL4 | 1 |
| c.779T>G †        | p.Phe260Cys        | CL4 | 1 |
| c.781G>A          | p.Gly261Arg        | CL5 | 2 |
| c.782G>A          | p.Gly261Glu        | CL5 | 1 |
| c.793G>A          | p.Glu265Lys        | CL5 | 1 |
| c.823C>G          | p.Arg275Gly        | CL4 | 1 |
| c.860A>T          | p.Gln287Leu        | CL5 | 1 |
| c.895G>C          | p.Gly299Arg        | CL5 | 1 |
| c.904G>A          | p.Val302Met        | CL4 | 1 |
| c.908G>C          | p.Arg303Pro        | CL4 | 1 |
| c.938dup          | p.Asn313fs         | CL5 | 1 |
| c.952G>A          | p.Gly318Arg        | CL5 | 1 |
| c.1007C>G         | p.Ser336Trp        | CL4 | 1 |
| c.1019+1G>T       | p.?                | CL5 | 1 |
| c.1020-1G>A       | p.?                | CL4 | 1 |
| c.1025_1034delins | p.Thr342fs         | CL5 | 1 |
| c.1067G>T         | p.Gly356Val        | CL4 | 1 |
| c.1068_1103del    | p.Leu357_Arg368del | CL4 | 1 |
| c.1072C>T         | p.Arg358*          | CL5 | 1 |
| c.1112G>T         | p.Cys371Phe        | CL5 | 1 |
| c.1118G>C         | p.Ser373Thr        | CL3 | 1 |
| c.1118G>A         | p.Ser373Asn        | CL4 | 1 |
| c.1121T>C         | p.Val374Ala        | CL4 | 1 |
| c.1133C>A         | p.Ala378Asp        | CL4 | 1 |
| c.1135G>A         | p.Ala379Thr        | CL4 | 1 |
| c.1144T>G         | p.Cys382Gly        | CL5 | 1 |

|                                                                                  |                       |                       |                           |
|----------------------------------------------------------------------------------|-----------------------|-----------------------|---------------------------|
| c.1148C>T                                                                        | p.Ser383Leu           | CL5                   | 1                         |
| c.1157_1160dup                                                                   | p.Val389fs            | CL5                   | 1                         |
| c.1174C>T                                                                        | p.Arg392Cys           | CL4                   | 1                         |
| c.1190G>A                                                                        | p.Arg397His           | CL4                   | 1                         |
| c.1195G>T                                                                        | p.Glu399*             | CL5                   | 2                         |
| c.1228G>A                                                                        | p.Gly410Ser           | CL4                   | 1                         |
| c.1240A>G                                                                        | p.Lys414Glu           | CL5                   | 1                         |
| c.1247A>C                                                                        | p.His416Pro           | CL4                   | 1                         |
| c.1268T>A                                                                        | p.Phe423Tyr           | CL4                   | 1                         |
| c.1318G>T                                                                        | p.Glu440*             | CL4                   | 1                         |
| c.1322C>T                                                                        | p.Ser441Leu           | CL4                   | 1                         |
| c.1324G>A                                                                        | p.Glu442Lys           | CL4                   | 1                         |
| c.1340G>A                                                                        | p.Arg447Gln           | CL5                   | 3                         |
| c.1348G>A                                                                        | p.Ala450Thr           | CL5                   | 2                         |
| c.1358C>T                                                                        | p.Ser453Leu           | CL5                   | 1                         |
| <b><i>HNF1A</i> NM_000545.6 (49 unique heterozygous variants in 63 probands)</b> |                       |                       |                           |
| <b>DNA change</b>                                                                | <b>Protein change</b> | <b>Classification</b> | <b>Number of probands</b> |
| c.(?-1)_(326+1_327-1)del                                                         | p.?                   | CL5                   | 1                         |
| c.25C>T                                                                          | p.Gln9*               | CL5                   | 1                         |
| c.98C>T                                                                          | p.Pro33Leu            | CL4                   | 2                         |
| c.130del                                                                         | p.Leu44fs             | CL5                   | 1                         |
| c.320T>C                                                                         | p.Leu107Pro           | CL5                   | 1                         |
| c.388C>T                                                                         | p.Gln130*             | CL5                   | 1                         |
| c.391C>T                                                                         | p.Arg131Trp           | CL5                   | 2                         |
| c.392G>A                                                                         | p.Arg131Gln           | CL5                   | 1                         |
| c.394G>A                                                                         | p.Glu132Lys           | CL4                   | 1                         |
| c.457C>T                                                                         | p.Pro153Ser           | CL3                   | 1                         |
| c.474G>T                                                                         | p.Lys158Asn           | CL5                   | 1                         |
| c.475C>T                                                                         | p.Arg159Trp           | CL5                   | 1                         |
| c.476G>A                                                                         | p.Arg159Gln           | CL5                   | 5                         |
| c.498C>A                                                                         | p.Tyr166*             | CL4                   | 1                         |

|                |             |     |   |
|----------------|-------------|-----|---|
| c.509A>C       | p.Gln170Pro | CL4 | 1 |
| c.511C>G       | p.Arg171Gly | CL4 | 1 |
| c.517_526+5del | p.Val173fs  | CL4 | 1 |
| c.526C>T       | p.Gln176*   | CL5 | 1 |
| c.526+1G>A     | p.?         | CL5 | 1 |
| c.526+1G>C     | p.?         | CL5 | 1 |
| c.527-1G>C     | p.?         | CL5 | 1 |
| c.598C>T       | p.Arg200Trp | CL5 | 1 |
| c.599G>A       | p.Arg200Gln | CL5 | 1 |
| c.626C>A       | p.Ala209Glu | CL3 | 1 |
| c.685C>T       | p.Arg229*   | CL5 | 2 |
| c.685C>G       | p.Arg229Gly | CL4 | 1 |
| c.690_691del   | p.Glu230fs  | CL5 | 1 |
| c.754C>T       | p.Gln252*   | CL5 | 1 |
| c.775G>A       | p.Val259Ile | CL4 | 1 |
| c.779C>T       | p.Thr260Met | CL5 | 2 |
| c.800G>A       | p.Trp267*   | CL4 | 1 |
| c.811C>T       | p.Arg271Trp | CL5 | 1 |
| c.811C>G       | p.Arg271Gly | CL4 | 1 |
| c.812G>A       | p.Arg271Gln | CL5 | 1 |
| c.814C>A       | p.Arg272Ser | CL5 | 1 |
| c.815G>A       | p.Arg272His | CL4 | 1 |
| c.833G>A       | p.Arg278Gln | CL4 | 1 |
| c.872dupC      | p.Gly292fs  | CL5 | 6 |
| c.966T>G       | p.Tyr322*   | CL5 | 1 |
| c.1016G>A      | p.Gly339Asp | CL3 | 1 |
| c.1135C>A      | p.Pro379Thr | CL4 | 1 |
| c.1136delC     | p.Pro379fs  | CL5 | 1 |
| c.1136_1137del | p.Pro379fs  | CL5 | 2 |
| c.1295C>T ‡    | p.Ser432Phe | CL3 | 1 |
| c.1333_1334del | p.Ser445fs  | CL5 | 1 |

|                                                                                  |                       |                       |                           |
|----------------------------------------------------------------------------------|-----------------------|-----------------------|---------------------------|
| c.1340C>T                                                                        | p.Pro447Leu           | CL5                   | 1                         |
| c.1475C>T                                                                        | p.Thr492Ile           | CL4                   | 1                         |
| c.1502-1G>T                                                                      | p.?                   | CL5                   | 1                         |
| c.1740_1743dup                                                                   | p.His582fs            | CL4                   | 1                         |
| <b><i>HNF4A</i> NM_175914.4 (27 unique heterozygous variants in 35 probands)</b> |                       |                       |                           |
| <b>DNA change</b>                                                                | <b>Protein change</b> | <b>Classification</b> | <b>Number of probands</b> |
| c.(?-1)_(1359?)del                                                               | p.?                   | CL5                   | 1                         |
| c.(826+1_827-1)_(1063+1_1064-1)del                                               | p.?                   | CL4                   | 1                         |
| c.-181G>T                                                                        | p.?                   | CL3                   | 1                         |
| c.-173_-172del                                                                   | p.?                   | CL3                   | 1                         |
| c.124G>A                                                                         | p.Gly42Arg            | CL3                   | 1                         |
| c.244del                                                                         | p.Val82fs             | CL5                   | 1                         |
| c.322G>A                                                                         | p.Val108Ile           | CL5                   | 1                         |
| c.334C>T                                                                         | p.Arg112Trp           | CL4                   | 1                         |
| c.340C>T                                                                         | p.Arg114Trp           | CL5                   | 5                         |
| c.352C>T                                                                         | p.Arg118*             | CL5                   | 1                         |
| c.421C>T                                                                         | p.Arg141*             | CL5                   | 2                         |
| c.502T>C                                                                         | p.Ser168Pro           | CL3                   | 1                         |
| c.537G>A                                                                         | p.Trp179*             | CL5                   | 1                         |
| c.572delT                                                                        | p.Leu191fs            | CL5                   | 1                         |
| c.582+1G>C                                                                       | p.?                   | CL5                   | 1                         |
| c.583-2A>G                                                                       | p.?                   | CL5                   | 1                         |
| c.610G>A                                                                         | p.Glu204Lys           | CL3                   | 1                         |
| c.617T>C                                                                         | p.Leu206Pro           | CL3                   | 1                         |
| c.625G>A †                                                                       | p.Gly209Arg           | CL4                   | 1                         |
| c.630_636del                                                                     | p.Thr211fs            | CL4                   | 1                         |
| c.734G>A                                                                         | p.Arg245His           | CL4                   | 2                         |
| c.869G>A                                                                         | p.Arg290His           | CL4                   | 1                         |
| c.918T>G                                                                         | p.Tyr306*             | CL5                   | 1                         |
| c.931C>T                                                                         | p.Arg311Cys           | CL5                   | 3                         |
| c.949C>G                                                                         | p.Leu317Val           | CL4                   | 1                         |



|                                                                            |                          |                       |                           |
|----------------------------------------------------------------------------|--------------------------|-----------------------|---------------------------|
| c.977C>T                                                                   | p.Thr326Ile              | CL5                   | 1                         |
| c.1063+1G>A                                                                | p.?                      | CL4                   | 1                         |
| <b>MT-TL1 (1 unique heteroplasmic variant in 24 probands)</b>              |                          |                       |                           |
| <b>DNA change</b>                                                          | <b>Protein change</b>    | <b>Classification</b> | <b>Number of probands</b> |
| m.3243A>G                                                                  | N/A                      | CL5                   | 25                        |
| <b>HNF1B NM_000458.3 (8 unique heterozygous variants in 18 probands)</b>   |                          |                       |                           |
| <b>DNA change</b>                                                          | <b>Protein change</b>    | <b>Classification</b> | <b>Number of probands</b> |
| c.(?-1)_(*1_?)del                                                          | p.?                      | CL5                   | 12                        |
| c.344+2T>C                                                                 | p.?                      | CL5                   | 1                         |
| c.344+3A>G                                                                 | p.?                      | CL3                   | 1                         |
| c.409A>G                                                                   | p.Arg137Gly              | CL3                   | 1                         |
| c.458A>G                                                                   | p.His153Arg              | CL5                   | 1                         |
| c.476C>T                                                                   | p.Pro159Leu              | CL4                   | 1                         |
| c.703C>T                                                                   | p.Arg235Trp              | CL4                   | 1                         |
| <b>ABCC8 NM_001287174.1 (8 unique heterozygous variants in 8 probands)</b> |                          |                       |                           |
| <b>DNA change</b>                                                          | <b>Protein change</b>    | <b>Classification</b> | <b>Number of probands</b> |
| c.395T>C                                                                   | p.Phe132Ser              | CL3                   | 1                         |
| c.1220T>C                                                                  | p.Leu407Pro              | CL3                   | 1                         |
| c.2588A>G                                                                  | p.His863Arg              | CL3                   | 1                         |
| c.3527A>G                                                                  | p.Tyr1176Cys             | CL4                   | 1                         |
| c.4135G>C ‡                                                                | p.Gly1379Arg             | CL4                   | 1                         |
| c.4139G>A                                                                  | p.Arg1380His             | CL5                   | 1                         |
| c.4274T>C                                                                  | p.Ile1425Thr             | CL4                   | 1                         |
| c.4435G>A                                                                  | p.Gly1479Arg             | CL4                   | 1                         |
| <b>PDX1 NM_000209.4 (7 unique heterozygous variants in 7 probands)</b>     |                          |                       |                           |
| <b>DNA change</b>                                                          | <b>Protein change</b>    | <b>Classification</b> | <b>Number of probands</b> |
| c.98dup                                                                    | p.Ala34fs                | CL4                   | 1                         |
| c.217dup                                                                   | p.Leu73fs                | CL4                   | 1                         |
| c.532G>A                                                                   | p.Glu178Lys              | CL4                   | 1                         |
| c.534_539del                                                               | p.Glu178_Ala180delinsAsp | CL3                   | 1                         |
| c.559G>A                                                                   | p.Glu187Lys              | CL3                   | 1                         |

|                                                                                  |                       |                       |                           |
|----------------------------------------------------------------------------------|-----------------------|-----------------------|---------------------------|
| c.466_472dup                                                                     | p.Leu158fs            | CL3                   | 1                         |
| c.697delG                                                                        | p.Glu233fs            | CL4                   | 1                         |
| <b><i>RFX6</i> NM_173560.3 (7 unique heterozygous variants in 7 probands)</b>    |                       |                       |                           |
| <b>DNA change</b>                                                                | <b>Protein change</b> | <b>Classification</b> | <b>Number of probands</b> |
| c.353del                                                                         | p.Lys118fs            | CL4                   | 1                         |
| c.575_585del                                                                     | p.Tyr192fs            | CL5                   | 1                         |
| c.872del                                                                         | p.Leu291fs            | CL4                   | 1                         |
| c.1068G>A                                                                        | p.Trp356*             | CL4                   | 1                         |
| c.1304_1307dup                                                                   | p.Glu436fs            | CL4                   | 1                         |
| c.1513C>T                                                                        | p.Arg505*             | CL4                   | 1                         |
| c.2499del                                                                        | p.Tyr834fs            | CL4                   | 1                         |
| <b><i>NEUROD1</i> NM_002500.4 (5 unique heterozygous variants in 5 probands)</b> |                       |                       |                           |
| <b>DNA change</b>                                                                | <b>Protein change</b> | <b>Classification</b> | <b>Number of probands</b> |
| c.316G>A                                                                         | p.Ala106Thr           | CL4                   | 1                         |
| c.321C>G                                                                         | p.Asn107Lys           | CL3                   | 1                         |
| c.337C>T                                                                         | p.Arg113Cys           | CL3                   | 1                         |
| c.340A>C                                                                         | p.Met114Leu           | CL4                   | 1                         |
| c.616dupC                                                                        | p.His206fs            | CL5                   | 1                         |
| <b><i>INS</i> NM_000207.2 (4 unique heterozygous variants in 4 probands)</b>     |                       |                       |                           |
| <b>DNA change</b>                                                                | <b>Protein change</b> | <b>Classification</b> | <b>Number of probands</b> |
| c.16C>T                                                                          | p.Arg6Cys             | CL5                   | 1                         |
| c.92G>T                                                                          | p.Cys31Phe            | CL5                   | 1                         |
| c.100C>T                                                                         | p.His34Tyr            | CL4                   | 1                         |
| c.130G>A                                                                         | p.Gly44Arg            | CL3                   | 1                         |
| <b><i>INSR</i> NM_000208.2 (2 unique heterozygous variants in 2 probands)</b>    |                       |                       |                           |
| <b>DNA change</b>                                                                | <b>Protein change</b> | <b>Classification</b> | <b>Number of probands</b> |
| c.1548G>A                                                                        | p.Trp516*             | CL4                   | 1                         |
| c.3602G>A                                                                        | p.Arg1201Gln          | CL4                   | 1                         |
| <b><i>KCNJ11</i> NM_000525.3 (1 unique heterozygous variant in 1 proband)</b>    |                       |                       |                           |
| <b>DNA change</b>                                                                | <b>Protein change</b> | <b>Classification</b> | <b>Number of probands</b> |
| c.761C>A                                                                         | p.Pro254Gln           | CL4                   | 1                         |

| <b><i>PLINI</i> NM_002666.5 (1 unique heterozygous variant in 1 proband)</b>                                    |                       |                       |                           |
|-----------------------------------------------------------------------------------------------------------------|-----------------------|-----------------------|---------------------------|
| <b>DNA change</b>                                                                                               | <b>Protein change</b> | <b>Classification</b> | <b>Number of probands</b> |
| c.1191_1192del                                                                                                  | p.Val398fs            | CL4                   | 1                         |
| <b><i>WFSI</i> NM_006005.3 (13 unique variants, either compound heterozygous or homozygous in 9 probands) §</b> |                       |                       |                           |
| <b>DNA change</b>                                                                                               | <b>Protein change</b> | <b>Classification</b> | <b>Number of probands</b> |
| c.124C>T                                                                                                        | p.Arg42*              | CL4                   | 1                         |
| c.406C>T                                                                                                        | p.Gln136*             | CL4                   | 1                         |
| c.670C>T                                                                                                        | p.Gln224*             | CL4                   | 1                         |
| c.958_972del                                                                                                    | p.Pro320_Ile324del    | CL3                   | 1                         |
| c.1037C>T                                                                                                       | p.Pro346Leu           | CL3                   | 1                         |
| c.1220del                                                                                                       | p.His407fs            | CL4                   | 1                         |
| c.1255_1260dup                                                                                                  | p.Phe419_Pro420dup    | CL3                   | 1                         |
| c.1511C>G                                                                                                       | p.Pro504Arg           | CL4                   | 1                         |
| c.1558C>T                                                                                                       | p.Gln520*             | CL5                   | 1                         |
| c.1620_1622del                                                                                                  | p.Trp540del           | CL4                   | 1                         |
| c.1672C>T                                                                                                       | p.Arg558Cys           | CL4                   | 1                         |
| c.2104G>A                                                                                                       | p.Gly702Ser           | CL4                   | 1                         |
| c.2207G>A                                                                                                       | p.Gly736Asp           | CL4                   | 1                         |

† one patient carried both the *GCK* c.779T>G p.Phe260Cys variant and the *HNF4A* c.625G>A p.Gly209Arg variant

‡ one patient carried both the *HNF1A* c.1295C>T p.Ser432Phe variant and the *ABCC8* c.4135G>C p.Gly1379Arg variant

§ Homozygous variants are indicated in grey. For genotypes of patients with compound heterozygous variants, see Table 2

**Supplementary Table 4:** Main characteristics of *GCK* patients at diabetes diagnosis

| MgD patients with variants in :           | <i>GCK</i>               |
|-------------------------------------------|--------------------------|
| N                                         | 124                      |
| Sex: female / men                         | 65% / 35%                |
| Eurocaucasian                             | 83% (108)                |
| ≥3 affected generations                   | 65% (114)                |
| Age at diagnosis                          | 15 [10-22] (119)         |
| BMI at diagnosis, kg/m <sup>2</sup>       | 20.25 [16.4-22.7] (92)   |
| BMI at referral, kg/m <sup>2</sup>        | 20.95 [18.55-24.4] (96)  |
| Symptoms at diagnosis †                   | 18% (116)                |
| HbA <sub>1c</sub> at diagnosis, %         | 6.3 [6-6.5] (84)         |
| HbA <sub>1c</sub> at diagnosis, mmol/mol  | 45.36 [42.35-47.55] (84) |
| HbA <sub>1c</sub> at referral, %          | 6.25 [6-6.6] (90)        |
| HbA <sub>1c</sub> at referral, mmol/mol   | 44.81 [41.81-59.57] (90) |
| Duration since diagnosis, years           | 1 [0-42] (119)           |
| Therapy at diagnosis:<br>insulin/OHA/diet | 8/11/86                  |
| Insulin therapy (at diagnosis)            | 4% (101)                 |
| Therapy at referral insulin/OHA/diet      | 9/19/86                  |
| Insulin therapy (at referral)             | 8% (114)                 |
| Arterial hypertension                     | 0% (98)                  |
| Dyslipidemia                              | 3% (71)                  |

**Supplementary Table 5:** Comparison of the clinical characteristics of patients with m.3243A>G mutation identified by Gene Panel Sequencing or by targeted m.3243A>G analysis

|                                                                         | Gene Panel Sequencing                    |                | Targeted analysis of m.3243A>G |                                           |                |
|-------------------------------------------------------------------------|------------------------------------------|----------------|--------------------------------|-------------------------------------------|----------------|
|                                                                         | Patients referred for monogenic diabetes |                | Patients referred for MIDD     | Patients referred for monogenic diabetes* |                |
| N                                                                       | 25                                       |                | 74                             | 15                                        |                |
| Sex: female/male                                                        | 48% / 52%                                |                | 50% / 50%                      | 60% / 40%                                 |                |
| Eurocaucasian                                                           | 64% (25)                                 |                | 78% (54)                       | 86% (14)                                  |                |
| Reported history of diabetes in the maternal family †                   | 72% (25)                                 |                | 87% (55)                       | 71% (14)                                  |                |
| Age at diagnosis, years                                                 | 31 [27.5-38] (25)                        |                | 35.5 [29.25-43] (68)           | 34 [24-39] (15)                           |                |
| Symptoms of diabetes ‡                                                  | 62.5% (24)                               |                | 46% (57)                       | 43% (14)                                  |                |
| BMI at diagnosis, kg/m <sup>2</sup>                                     | 21.08 [18.29-22.2] (22)                  |                | 20.8 [18.6-22.7] (57)          | 20,57 [19.32-21.94] (12)                  |                |
| Normal                                                                  | 91%                                      |                | 86%                            | 100%                                      |                |
| overweight                                                              | 9%                                       |                | 14%                            | -                                         |                |
| HbA <sub>1c</sub> at diagnosis, %                                       | 10.25 [7.75-12.15] (16)                  |                | 9.2 [7.5-11.9] (37)            | 7.1 [7-12.1] (11)                         |                |
| HbA <sub>1c</sub> at diagnosis, mmol/mol                                | 88.53 [61.21-109.3] (16)                 |                | 77.06 [58.48-106.6] (37)       | 54.1 [53.01-108.8] (11)                   |                |
| Insulin therapy (at diagnosis)                                          | 41% (22)                                 |                | 34% (55)                       | 13% (15)                                  |                |
| HbA <sub>1c</sub> at referral, %                                        | 7.15 [6.1-8.375] (22)                    |                | 7.5 [6.675-8.6] (54)           | 7.7 [6.658-8.65] (14)                     |                |
| HbA <sub>1c</sub> at referral, mmol/mol                                 | 54.65 [43.17-68.04] (22)                 |                | 57.48 [49.46-70.5] (54)        | 60.66 [49.27-71.04] (14)                  |                |
| Insulin therapy (at referral)                                           | 64% (25)                                 |                | 65% (63)                       | 67% (15)                                  |                |
|                                                                         | At referral                              | Post-diagnosis |                                | At referral                               | Post-diagnosis |
| Deafness yes/not reported or yes/no/unevaluated <i>via</i> hearing test | 5/20                                     | 14/1/10        | 64/1                           | 0/15                                      | 3/0/9          |
| Cardiomyopathy                                                          | 1                                        | 4              | 11                             | 1                                         | 1              |
| Diabetes in the mother: yes/no/unevaluated                              | 14/6/5                                   |                | 41/2/33                        | 8/3/4                                     |                |
| Deafness in the mother: yes/unevaluated <i>via</i> hearing test         | 6/19                                     |                | 37/37                          | 2/11                                      |                |

\* Replication cohort: 536 probands previously screened with a panel approach not including the m.3243A>G mutation, with age at diagnosis between 15 and 40 years old, BMI at diagnosis <25 (or when BMI at diagnosis was not available, BMI at referral < 25)

† Counting patients as long as a relative is diabetic in the maternal family (maternal grand-mother, maternal uncle...) even if the mother is not known to be diabetic

‡ Symptoms defined by polyuria, weight loss, ketosis or ketoacidosis

Data are presented as median [25<sup>th</sup> percentile - 75<sup>th</sup> percentile] unless otherwise indicated. (n) total number of patients with available data.

No parameter is significantly different between patients identified through Gene Panel Sequencing and those referred for MIDD

**Supplementary Table 6:** Comparison of the clinical characteristics of patients with an *HNF1B* mutation identified by Gene Panel Sequencing or by targeted analysis of the *HNF1B* gene

|                                             | Gene Panel Sequencing    |                | Targeted analysis of <i>HNF1B</i> | p        |
|---------------------------------------------|--------------------------|----------------|-----------------------------------|----------|
| N                                           | 18                       |                | 145*                              |          |
| Genotype: gene deletion / mutation          | 67% / 33%                |                | 60% / 40%                         | ns       |
| Sex: female / male                          | 44.4% / 55.6%            |                | 54.5% / 45.5%                     | ns       |
| Eurocaucasian                               | 82.4% (17)               |                | 83% (141)                         | ns       |
| Parent with diabetes                        | 93.3% (15)               |                | 52.1% (144)                       | < 0.0001 |
| Reported familial history of renal disease† | 16.7% (18)               |                | 33.8% (145)                       | ns       |
| Age at diagnosis, years                     | 27 [14.5-33.5] (18)      |                | 26 [18-34.25] (130)               | ns       |
| Symptoms of diabetes ‡                      | 58.8% (17)               |                | 46.3% (121)                       | ns       |
| BMI at diagnosis, kg/m <sup>2</sup>         | 22.9 [20.2-27.2] (15)    |                | 22.2 [19-24.1] (103)              | ns       |
| HbA <sub>1c</sub> at diagnosis, %           | 9.7 [6.85-13.65] (14)    |                | 10.1 [6.7-14.7] (67)              | ns       |
| HbA <sub>1c</sub> at diagnosis, mmol/mol    | 82.52 [51.37-125.7] (14) |                | 87 [50-137] (67)                  |          |
| Insulin therapy (at diagnosis)              | 61.1% (18)               |                | 49.6% (115)                       | ns       |
| HbA <sub>1c</sub> at referral, %            | 7.35 [6.52-9.05] (16)    |                | 7.1 [6.2-8.1] (119)               | 0.0244   |
| HbA <sub>1c</sub> at referral, mmol/mol     | 56.84 [47.82-75.42] (16) |                | 54.1 [44.27-65.03] (119)          |          |
| Insulin therapy (at referral)               | 75% (16)                 |                | 82.6% (115)                       | ns       |
| Decreased renal function (at referral) §    | 5 (33.3%) (15)           |                | 35 (50.7%) (69)                   | ns       |
|                                             | At referral              | Post-diagnosis |                                   |          |
| Kidney morphological abnormalities          | 6                        | 9              | 116 (127)                         | < 0.0001 |
| Genital tract abnormalities                 | 1                        | 3              | 39 (61)                           | 0.0005   |
| Pancreas morphological abnormalities        | 2                        | 4              | 50 (77)                           | 0.0013   |
| Intellectual/Learning disability            | 2                        | 2              | 21 (93)                           | ns       |

Data are presented as median [25<sup>th</sup> percentile - 75<sup>th</sup> percentile] unless otherwise indicated. (n)

total number of patients with available data. ns: not significant.

\* reported in (1)

† kidney cysts or kidney failure

‡ Symptoms defined by polyuria, weight loss, ketosis or ketoacidosis

§ Chronic Kidney Disease stages 3 and 4, defined as an eGFR between 59 and 15 ml/min/1.73 m<sup>2</sup>, or ESRD, end-stage renal disease, defined as an eGFR < 15ml/min/1.73 m<sup>2</sup>, or dialysis or kidney transplantation.

1 - Dubois-Laforgue D, Cornu E, Saint-Martin C, Coste J, Bellanné-Chantelot C, Timsit J. Diabetes, Associated Clinical Spectrum, Long-term Prognosis, and Genotype/Phenotype Correlations in 201 Adult Patients With Hepatocyte Nuclear Factor 1B ( *HNF1B* ) Molecular Defects. *Diabetes Care*. 2017 Nov;40(11):1436–43.
