# Supplementary material
Source: publisher figshare collection journal article supplement (https://diabetesjournals.figshare.com/articles/dataset/_/16608850)
Supplement: Supplementary file 2 [file 3]

**Gene panel sequencing of patients with monogenic diabetes brings to light genes typically associated with syndromic presentations** by Cécile Saint-Martin *et al*

**Additional file:** List of Investigators of the French Monogenic Diabetes Study Group of the Société Francophone du Diabète

| <b>Hospital</b>                              | <b>Investigator</b>                                            |
|----------------------------------------------|----------------------------------------------------------------|
| CHU ANGERS                                   | ALLIX Ingrid, LABOUREAU Sandrine, MARCHE Pauline               |
| CH ANGOULEME                                 | CHAMEAU-LAGARDE Anne-Marie, RUCHETON Philippe                  |
| CH ARGENTEUIL                                | BENSMINE Faiza                                                 |
| CHIC R BALLANGER - AULNAY                    | ISTANBULLU Guler Sibel                                         |
| AP-HP Hôpital Jean Verdier - BONDY           | LUCIDARME Nadine                                               |
| CH BOULOGNE-SUR-MER                          | BRESSON Regis                                                  |
| CHU La Cavale Blanche - BREST                | SONNET Emmanuel                                                |
| CHU Hôpital Côte de Nacre - CAEN             | REZNIK Yves, JOUBERT Michael                                   |
| CH RENE DUBOS - PONTOISE                     | GONFROY Celine, SARDA Helene                                   |
| CHU GABRIEL MONTPIED - CLERMONT-FERRAND      | BATISSE Marie, DALLEL Sarah                                    |
| CH COMPIEGNE                                 | BARJON Jean-Noel                                               |
| CH SUD FRANCILIEN - CORBEIL ESSONNES         | CHARPENTIER Guillaume, EROUKHMANOFF Juliette, PENFORMIS Alfred |
| CHU DIJON                                    | FOURMONT Coralie                                               |
| CHU GRENOBLE                                 | BENHAMOU Pierre-Yves                                           |
| CHD VENDEE                                   | TIRIAU Soizic                                                  |
| CH SAINT LOUIS - LA ROCHELLE                 | DJAKOURE Charlotte, GOUET Didier                               |
| AP-HP Hôpital Bicêtre - LE KREMLIN-BICETRE   | AFFRES-GRATEAU Helene                                          |
| POLE SANTE SUD - LE MANS                     | RUDELLE Hélène                                                 |
| CH DU MONT DORE                              | LEGER-GUIST'HAU Julie                                          |
| CHU CLAUDE HURIEZ - LILLE                    | VANTYGHEM Marie-Christine                                      |
| CHU Dupuytren - LIMOGES                      | PLAS Camille                                                   |
| CH DE LUNEVILLE                              | MAYER Laure, ROLLAND Ludovic                                   |
| AP-HM - Hôpital de La Conception - MARSEILLE | GABORIT Benedicte, RACCAH Denis                                |
| AP-HM - Hôpital de La Timone - MARSEILLE     | VIERGE Mélody, VALERO René                                     |
| AP-HM - Hôpital Nord - MARSEILLE             | LE MARC-HADOUR Pauline, VINCENTELLI Clara                      |
| CH MONTARGIS                                 | AUTHIER Andréa                                                 |
| CHR Hôpital Bel-Air - METZ-THIONVILLE        | COUPEZ Ludovic                                                 |
| CH Emile Muller - MULHOUSE                   | BERTHELON Karen                                                |
| CHU Hôpital de Brabois - NANCY               | JELLIMANN Stephanie, LEGAGNEUR Carole                          |

|                                               |                                                                                                                             |
|-----------------------------------------------|-----------------------------------------------------------------------------------------------------------------------------|
| NANTES                                        | FERRON-BERNAT Stephanie                                                                                                     |
| CHU Hôpital Laënnec - NANTES                  | AUFFRET Hélène, COLOMBEL Agnès                                                                                              |
| CHU Hôpital Femme-enfant-adolescent - NANTES  | CAQUARD Marylène                                                                                                            |
| CHU Hôpital Carémeau - NIMES                  | GILLY Olivier                                                                                                               |
| AP-HP Hôpital de la Pitié Salpêtrière - PARIS | CARLIER Aurelie, CIANGURA Cécile, FADLALLAH Jehane, HALBRON Marine, JACQUEMINET-NEVANT Sophie, LAROCHE Suzanne, VESCO Lydia |
| AP-HP Hôpital Cochin - PARIS                  | DEGHANI Léa, DIEDISHEIM Marc, DONATH Xavier, DUBOIS-LAFORGUE Danielle, TIERCELIN Clarisse, TIMSIT José                      |
| AP-HP Hôpital Robert Debré - PARIS            | HARBULOT Carole                                                                                                             |
| CHU LYON, Hôpital Lyon Sud, PIERRE BENITE     | MARCHAND Lucien                                                                                                             |
| CH PONTARLIER                                 | KURY-PAULIN Stephanie                                                                                                       |
| CHU REIMS                                     | DOCO-FENZY Martine, DELEMER Brigitte, GRULET Hervé, LUKAS-CROISIER Céline, POIRSIER Céline                                  |
| CHU Hôpital Sud - RENNES                      | DE KERDANET Marc                                                                                                            |
| CH ROANNE                                     | BAGOU Marine, BONCOMPAIN Elsa                                                                                               |
| GHER - SAINT BENOIT - LA REUNION              | APPAVOUPOULLE Vincent                                                                                                       |
| CH SAINT-BRIEUC                               | PRIOU-GUESDON Mélanie                                                                                                       |
| CHU FELIX GUYON - SAINT DENIS - LA REUNION    | DEBUSSCHE Xavier, FLAUS FURMANIUK Anna                                                                                      |
| CHU Hôpital Nord - SAINT-ETIENNE              | JUTTET Pauline                                                                                                              |
| CH SAINT JUNIEN                               | THUILLIER Frédéric                                                                                                          |
| CH Mémorial France Etats Unis - SAINT LO      | FOURMY-CHATEL Corinne, TRZEPLA Geraldine                                                                                    |
| HIA BEGIN - SAINT MANDE                       | BORDIER                                                                                                                     |
| CH SAINT NAZAIRE                              | AUFFRET Hélène                                                                                                              |
| CH TROYES                                     | ZIMMERMANN Brigitte                                                                                                         |
| CH BRETAGNE ATLANTIQUE - VANNES               | DUGRE Isabelle, FIERRARD Helene                                                                                             |
